# Supplementary material for: The impact of secondary operating temperature on in-line coagulation/flocculation and fouling of membranes used in tertiary treatment
Source: Royal Society of Chemistry journal article supplement (doi:10.1039/d4ew00239c), 2024-01-01
Supplement: d4ew00239c1.pdf [file d4ew00239c1.pdf]

# **The impact of secondary operating temperature on in-line coagulation/flocculation and fouling of membranes used in tertiary treatment**

Chen Tao <sup>a, b, \*</sup>, Wayne Parker <sup>b</sup>, Pierre Bérubé <sup>c</sup>

<sup>a</sup> School of Earth and Environment, Anhui University of Science and Technology, Huainan,  
China, 232001

<sup>b</sup> Department of Civil and Environmental Engineering, University of Waterloo, 200 University  
Avenue West., Waterloo, Ontario, Canada, N2L 3G1

<sup>c</sup> Department of Civil Engineering, The University of British Columbia, 6250 Applied Science  
Lane, Vancouver, British Columbia, Canada, V6T 1Z4

# Supplementary Material

## I. Descriptions of SBRs

Two identical lab-scale sequencing batch reactors (SBR) were operated with a 4 h cycle duration to approximate continuous flow conditions (Fig. S1). One SBR was operated at 20°C as a control while the other SBR was operated at 8°C for over one year. The temperatures are representative of summer and winter operating conditions in Ontario, Canada. The SBRs were fed with real municipal wastewater collected every two days from the City of Waterloo sewer system and sieved with a 2 mm mesh to remove large particles. The raw wastewater was chilled at 4°C during storage to ensure the stability of organic matter. The solids retention time (SRT) was maintained at 25 days. Both SBRs reached pseudo steady state before sampling.

Each reactor consisted of a 12 L polymethyl methacrylate container with a working volume of 10 L. A mechanical mixer with a shaft paddle operating at 150 rpm was employed to mix the SBR contents. A constant airflow for aeration was provided through an air diffuser located at the bottom of the reactor. A water jacket, controlled by a chiller (Polyscience, USA), was used to maintain the water temperature inside the test SBR while the control reactor was operated at room temperature (20°C). The water temperature was regularly monitored by a thermometer. The SBR time sequence process was controlled using LabView® software (version 2017, National Instruments Corporation, USA).

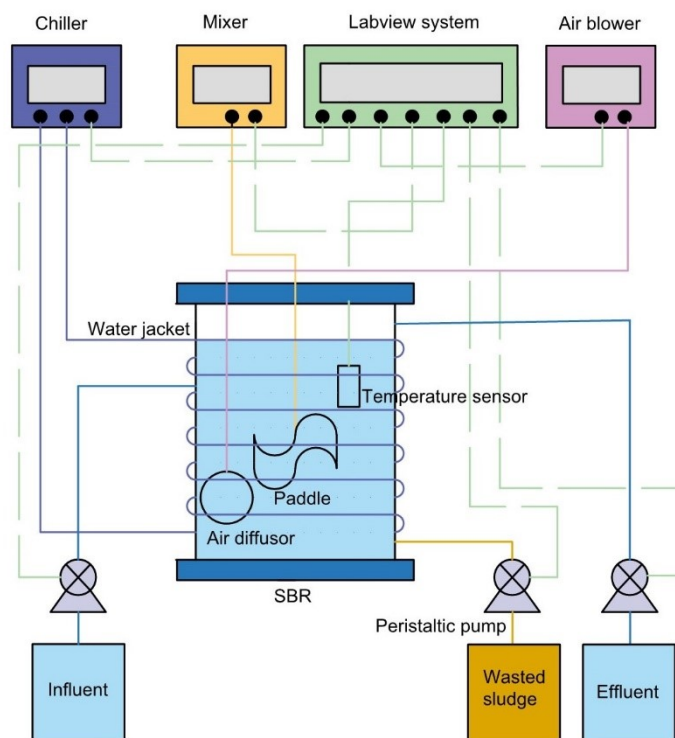

**Fig. S1. Schematic of laboratory-scale SBR.**

**II. Table S1. Characteristics of raw wastewater and SBR effluents.**

| Parameters                             | Raw wastewater | SBR (20°C) | SBR (8°C) |
|----------------------------------------|----------------|------------|-----------|
|                                        | HRT = 10 h     |            |           |
| Turbidity (NTU)                        | 305±27         | 3.6±0.5    | 8.2±1.9   |
| sCOD (mg/L)                            | 156±13         | 47±6       | 79±9      |
| tCOD (mg/L)                            | 501±22         | 81±8       | 107±8     |
| DOC (mg/L)                             | 50±6           | 10.5±0.5   | 14.9±0.7  |
| NO <sub>3</sub> <sup>-</sup> -N(mg/L)  | 0.46±0.04      | 40±3       | 34±3      |
| NO <sub>2</sub> <sup>-</sup> -N (mg/L) | a              | a          | a         |
| NH <sub>4</sub> <sup>+</sup> -N (mg/L) | 57±5           | a          | a         |

<sup>a</sup> Below detection limits (2 mg/L for ammonia-N, 0.6 mg/L for nitrite-N).

**III. Table S2. Summary of the five constant flow combined fouling models (Bolton et al. 2006).**

| Model                 | Equation                                                                                              | Fitted parameters                                                     |
|-----------------------|-------------------------------------------------------------------------------------------------------|-----------------------------------------------------------------------|
| Cake-complete         | $\frac{P}{P_0} = \frac{1}{(1 - K_b t)} \left( 1 - \frac{K_c J_0^2}{K_b} \ln(1 - K_b t) \right)$       | K <sub>c</sub> (s/m <sup>2</sup> ), K <sub>b</sub> (s <sup>-1</sup> ) |
| Cake-intermediate     | $\frac{P}{P_0} = \exp(K_i J_0 t) \left( 1 + \frac{K_c J_0}{K_i} (\exp(K_i J_0 t) - 1) \right)$        | K <sub>c</sub> (s/m <sup>2</sup> ), K <sub>i</sub> (m <sup>-1</sup> ) |
| Complete-standard     | $\frac{P}{P_0} = \frac{1}{(1 - K_b t) \left( 1 + \frac{K_s J_0}{2K_b} \ln(1 - K_b t) \right)^2}$      | K <sub>b</sub> (s <sup>-1</sup> ), K <sub>s</sub> (m <sup>-1</sup> )  |
| Intermediate-standard | $\frac{P}{P_0} = \frac{\exp(K_i J_0 t)}{\left( 1 - \frac{K_s}{2K_i} (\exp(K_i J_0 t) - 1) \right)^2}$ | K <sub>i</sub> (m <sup>-1</sup> ), K <sub>s</sub> (m <sup>-1</sup> )  |

|               |                                                                           |                                                           |
|---------------|---------------------------------------------------------------------------|-----------------------------------------------------------|
| Cake-standard | $\frac{P}{P_0} = \left(1 - \frac{K_s J_0 t}{2}\right)^{-2} + K_c J_0^2 t$ | $K_c \text{ (s/m}^2\text{)}, K_s \text{ (m}^{-1}\text{)}$ |
|---------------|---------------------------------------------------------------------------|-----------------------------------------------------------|

---
